# Supplementary material
Source: PubMed Central journal article supplement (PMC4794031)
Supplement: alpa023034.ww1_default.pdf [file alpa023034.ww1_default.pdf]

**Supplementary table A: Adjusted hazard ratios of coronary heart disease event in lipid-lowering drug users by different population strata**

| Strata                                 | Number (%) of events       |            | Adjusted hazard ratio<br>(95% confidence interval) |
|----------------------------------------|----------------------------|------------|----------------------------------------------------|
|                                        | Lipid-lowering<br>drug use | No use     |                                                    |
| Age < 75 years                         | 66 (5.2%)                  | 163 (5.3%) | 0.92 (0.68 to 1.26)                                |
| Age ≥ 75 years                         | 63 (8.1)                   | 148 (6.4)  | 1.33 (0.96 to 1.85)                                |
| Men                                    | 66 (9.9)                   | 176 (8.5)  | 0.99 (0.73 to 1.35)                                |
| Women                                  | 63 (4.6)                   | 135 (4.0)  | 1.24 (0.89 to 1.73)                                |
| Triglycerides < 1.6 mmol/l             | 78 (5.1)                   | 218 (5.3)  | 1.03 (0.79 to 1.35)                                |
| Triglycerides ≥ 1.6 mmol/l             | 40 (9.8)                   | 69 (7.1)   | 1.20 (0.79 to 1.82)                                |
| Body mass index < 27 kg/m <sup>2</sup> | 78 (5.9)                   | 217 (5.8)  | 1.14 (0.87 to 1.51)                                |
| Body mass index ≥ 27kg/m <sup>2</sup>  | 49 (6.8)                   | 89 (5.6)   | 1.02 (0.69 to 1.51)                                |
| Systolic pressure < 145 mmHg           | 48 (5.1)                   | 120 (4.4)  | 1.31 (0.91 to 1.88)                                |
| Systolic pressure ≥ 145 mmHg           | 79 (7.2)                   | 190 (7.0)  | 0.97 (0.73 to 1.29)                                |
| No hypertension                        | 19 (4.6)                   | 45 (3.3)   | 1.82 (1.01 to 3.29)                                |
| Hypertension                           | 110 (6.7)                  | 266 (6.6)  | 1.01 (0.79 to 1.29)                                |
| Propensity score<br>Lowest third       | 33 (6.0)                   | 150 (6.1)  | 1.06 (0.72 to 1.57)                                |

|               |          |           |                     |
|---------------|----------|-----------|---------------------|
| Middle third  | 37 (4.7) | 98 (4.7)  | 0.97 (0.66 to 1.41) |
| Highest third | 94 (9.1) | 119 (8.2) | 1.04 (0.79 to 1.37) |

**Note**

Adjusted hazard ratios were estimated using multivariate Cox proportional hazard model with age as the time scale. Subjects scoring in the first third of the propensity score distribution have the lowest probabilities of being treated with lipid – lowering drug.

**Supplementary table B: Adjusted hazard ratios of stroke event in lipid-lowering drug users by different population strata**

| Strata                                 | Number (%) of events    |           | Adjusted hazard ratio<br>(95% confidence interval) |
|----------------------------------------|-------------------------|-----------|----------------------------------------------------|
|                                        | Lipid-lowering drug use | No use    |                                                    |
| Age < 75 years                         | 21 (1.7)                | 93 (3.0)  | 0.47 (0.28 to 0.76)                                |
| Age ≥ 75 years                         | 37 (4.8)                | 141 (6.1) | 0.79 (0.54 to 1.16)                                |
| Men                                    | 21 (3.2)                | 106 (5.2) | 0.58 (0.36 to 0.95)                                |
| Women                                  | 37 (2.7)                | 128 (3.8) | 0.66 (0.45 to 0.98)                                |
| Triglycerides < 1.6 mmol/l             | 45 (2.9)                | 169 (4.1) | 0.72 (0.51 to 1.02)                                |
| Triglycerides ≥ 1.6 mmol/l             | 7 (1.7)                 | 46 (4.8)  | 0.33 (0.15 to 0.75)                                |
| Body mass index < 27 kg/m <sup>2</sup> | 37 (2.8)                | 152 (4.0) | 0.69 (0.47 to 1.02)                                |
| Body mass index ≥ 27kg/m <sup>2</sup>  | 21 (2.9)                | 80 (5.0)  | 0.58 (0.35 to 0.95)                                |
| Systolic pressure < 145 mmHg           | 24 (2.5)                | 88 (3.2)  | 0.78 (0.48 to 1.27)                                |
| Systolic pressure ≥ 145 mmHg           | 34 (3.1)                | 146 (5.4) | 0.56 (0.38 to 0.83)                                |
| No hypertension                        | 7 (1.7)                 | 40 (2.9)  | 0.69 (0.30 to 1.57)                                |
| Hypertension                           | 51 (3.1)                | 194 (4.8) | 0.64 (0.46 to 0.89)                                |
| Propensity score<br>Lowest third       | 9 (2.3)                 | 99 (4.7)  | 0.56 (0.28 to 1.12)                                |

|               |          |          |                     |
|---------------|----------|----------|---------------------|
| Middle third  | 14 (2.1) | 62 (3.4) | 0.60 (0.34 to 1.08) |
| Highest third | 35 (3.5) | 73 (4.9) | 0.71 (0.46 to 1.08) |

**Note**

Adjusted hazard ratios were estimated using multivariate Cox proportional hazard model with age as the time scale. Subjects scoring in the first third of the propensity score distribution have the lowest probabilities of being treated with lipid – lowering drug.

**Supplementary table C: Matched propensity score analysis: risk of vascular events in lipid-lowering drug users compared to non users**

| <b>Baseline lipid-lowering drug (LLD) use</b> | <b>Number of events</b> | <b>Hazard ratios (95% confidence interval) for vascular events</b> |
|-----------------------------------------------|-------------------------|--------------------------------------------------------------------|
| <b>Coronary heart disease or stroke</b>       |                         |                                                                    |
| No lipid-lowering drug                        | 206                     | Reference                                                          |
| Statins or fibrates                           | 185                     | 0.95 [0.75-1.22]                                                   |
| <b>Stroke</b>                                 |                         |                                                                    |
| No lipid-lowering drug                        | 89                      | Reference                                                          |
| Statins or fibrates                           | 57                      | 0.68 [0.44-1.05]                                                   |
| <b>Coronary heart disease</b>                 |                         |                                                                    |
| No lipid-lowering drug                        | 117                     | Reference                                                          |
| Statins or fibrates                           | 128                     | 1.17 [0.86-1.58]                                                   |

**Note**

Each participant treated with lipid-lowering drug was matched on propensity score with an untreated participant (2,026 individuals in each treatment group). Due to reduced sample size, hazard ratio confidence intervals are larger than those estimated in the whole study population (n=7,484).
